# Supplementary material for: DNA Barcoding of Morphologically Characterized Mosquitoes Belonging to the Genus Mansonia from the Atlantic Forest and Brazilian Savanna
Source: MDPI journal article supplement (doi:10.3390/insects14020109), 2023-01-20

#Result of GMYC species delimitation

method: single  
likelihood of null model: 724.6707  
maximum likelihood of GMYC model: 877.8727  
likelihood ratio: 306.4039  
result of LR test: 0\*\*\*

number of ML clusters: 13  
confidence interval: 13-13

number of ML entities: 33  
confidence interval: 33-33

threshold time: -1e-06

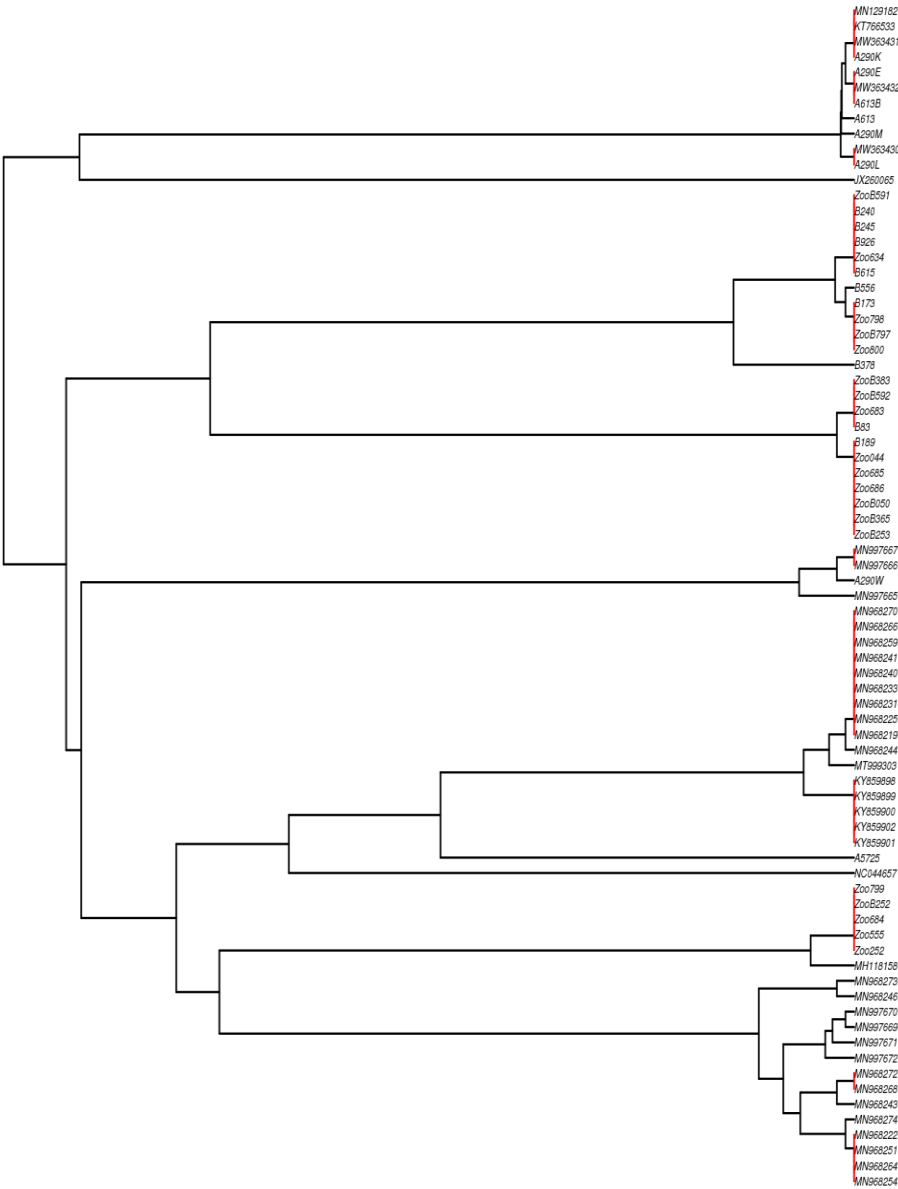

Supplement: s1 [file s1]
