# Supplementary figures and images for: DNA Barcoding of Morphologically Characterized Mosquitoes Belonging to the Genus Mansonia from the Atlantic Forest and Brazilian Savanna
Source: MDPI journal article supplement (doi:10.3390/insects14020109), 2023-01-20

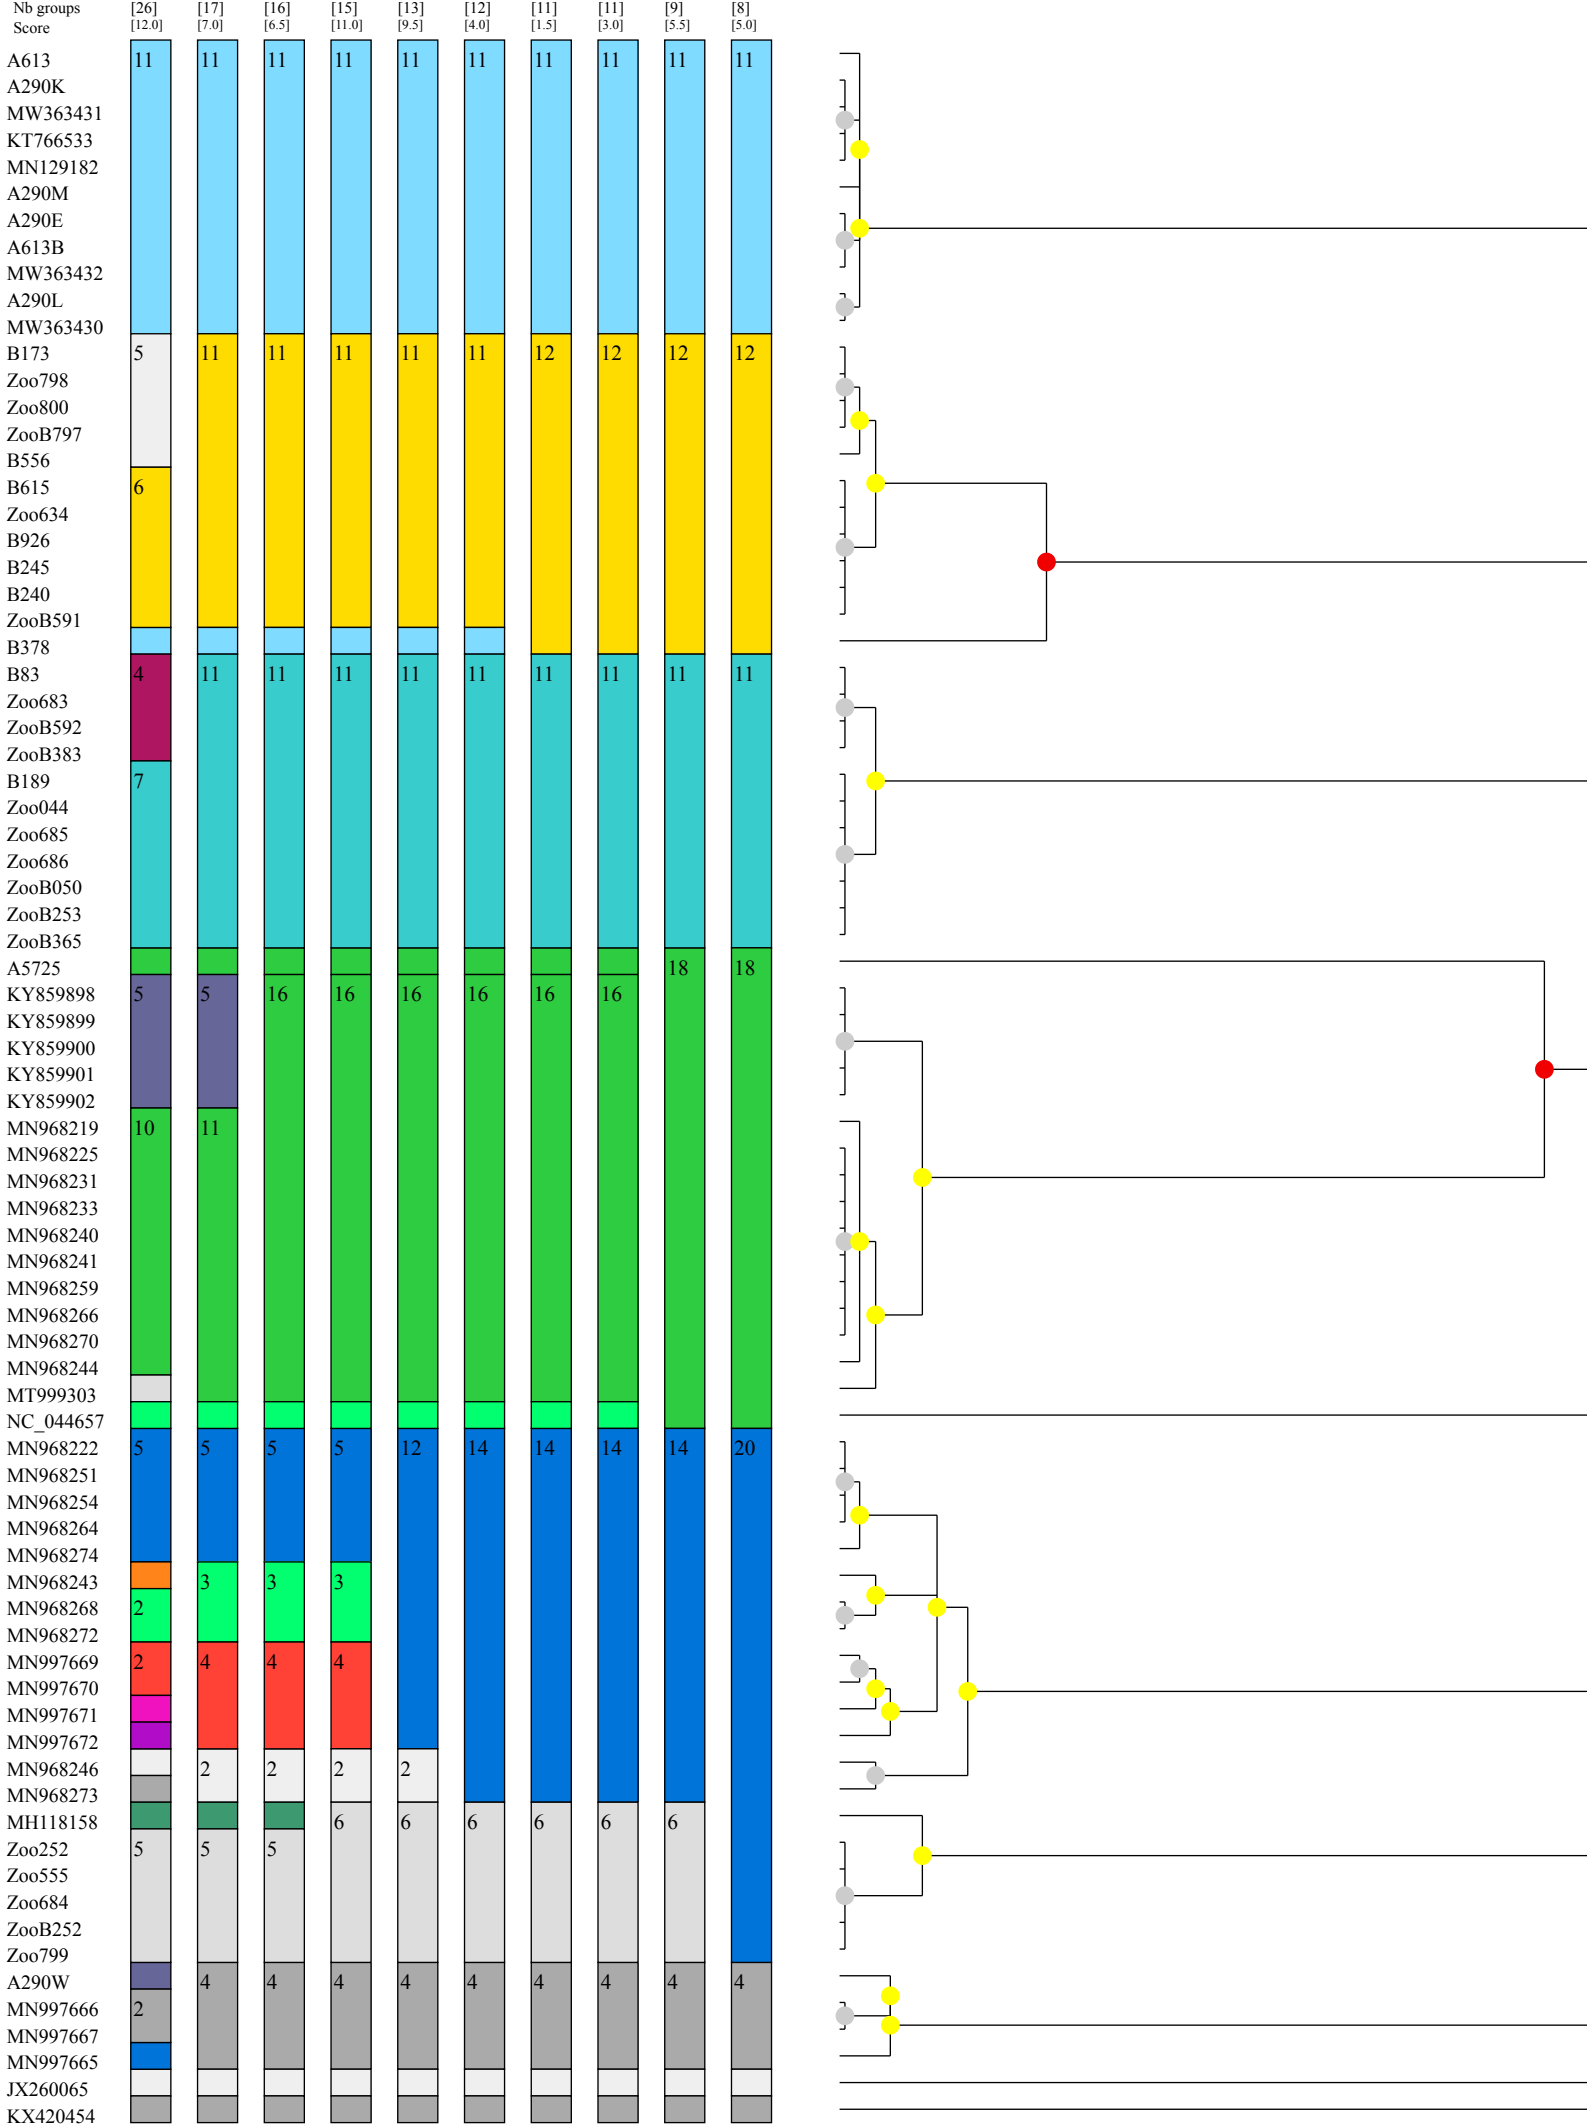

Supplement: s1 [file s1]

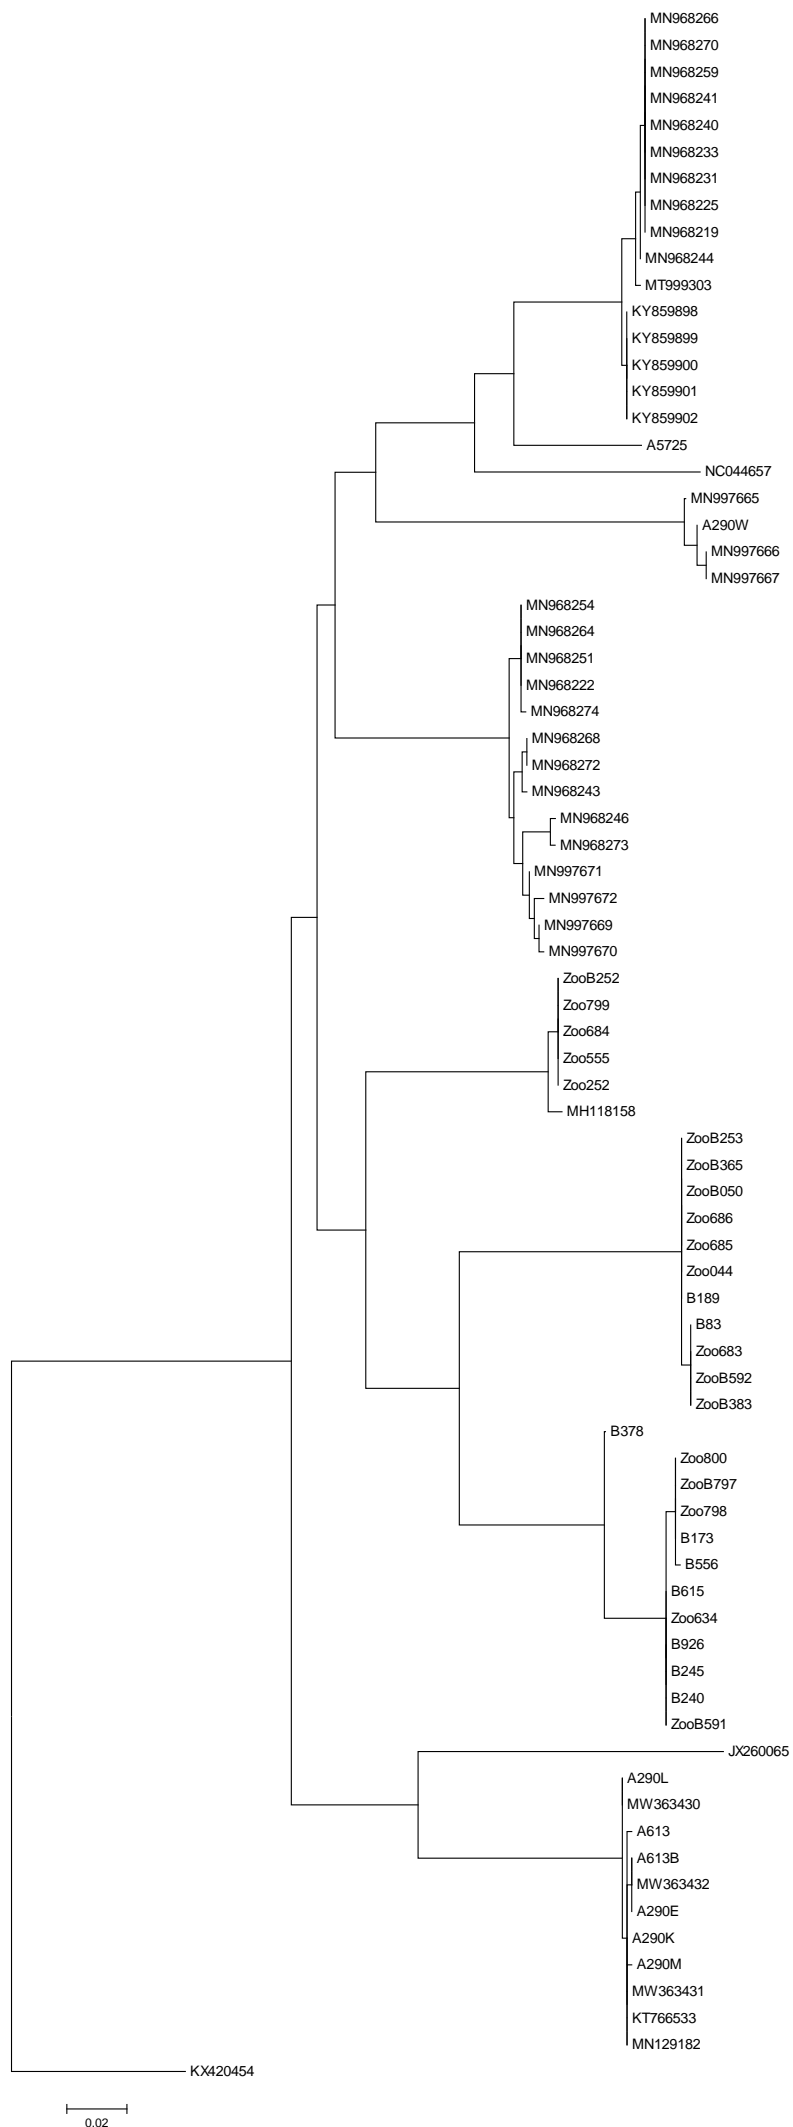

Supplement: s1 [file s1]
